# Supplementary material for: Diagnostic Performance of CMR Parametric Mapping as per Modified Lake Louise Criteria in Acute Myocarditis: An Updated Systematic Review and Meta-Analysis
Source: Research Square preprint supplement (doi:10.21203/rs.3.rs-5026991/v1), 2024-10-01
Supplement: Supplementary file 1 [file 7f23cba2f502ad4ab3aea83d.docx]

**Table 1: Summary of study characteristics, demography of included studies.**

| SN | Author (First Author) | Year | Study design | Baseline characteristics of patients | | | | Reference Standard |
| --- | --- | --- | --- | --- | --- | --- | --- | --- |
| Age | Male (%) | N | Presentation |
| 1 | Huber | 2018 | Retrospective cohort with case-control element | | 45(29-61) | | --- | |  | |  | |  | |  | |  | |  | |  | |  | | | 60/40 | | --- | |  | |  | |  | |  | |  | |  | |  | |  | | 60 | Acute | CLINICAL |
| 2 | | Radunski | | --- | |  | |  | |  | |  | |  | |  | |  | | 2014 | Retrospective case control | 44 | 76/24 | 125 | Acute | CLINICAL |
| 3 | Isaaki | 2021 | Retrospective case control | 17(14-20) | 77/23 | 56 | Acute | EMB |
| 4 | Palmisano | 2020 | Prospective case control | 39(28-46) | 51/49 | 43 | Acute | CLINICAL |
| 5 | Luetkens | 2015 | Prospective case control | 44.9(26.2-63.17) | 50/50 | 84 | Acute | CLINICAL |
| 6 | Li | 2021 | Retrospective cohort with case-control element | 32 (18-50 | 71.2/28.8 | 73 | Acute | EMB |
| 7 | Lurz | 2016 | Prospective cohort with case-control element | 40 | 83/17 | 129 | Acute | EMB |
| 8 | Knobelsdorff-Brenkenhoff | 2017 | Prospective cohort with case-control element | 24.5 | 78/22 | 36 | Acute | CLINICAL |
| 9 | Luetkens | 2019 | Prospective cohort with case-control element | 41(23-64) | 72.5/27.5 | 66 | Acute | CLINICAL |
| 10 | Dabir | 2019 | Prospective cohort with case-control element | 38(22-54) | 77/23 | 80 | Acute | CLINICAL |
| 11 | Brendel | 2022 | Prospective cohort with case-control element | 48 (30–63) | 44/56 | 48 | Acute | EMB |

| Study ID | Native T1 Control | | Native T1 Cases | T2 Control | | | | T2 Cases | | ECV Control | | | ECV Cases | Native T1 mapping technique | | T2 mapping technique | | | Vendor | Magnet strength |
| --- | --- | --- | --- | --- | --- | --- | --- | --- | --- | --- | --- | --- | --- | --- | --- | --- | --- | --- | --- | --- |
| Huber 2028 | 965 (940-990) | | 1044 (981-1107) | 48 (46-50) | | | | 53 (49-57) | | 22 (19-25) | | | 24 (17-31) | MOLLI | | bSSFP | | | Siemens | 1.5 T |
| Radunski 2014 | 1051 (1010-1063) | | 1098 (1057-1139) | 55 (54-60) | | | | 61 (58-65) | | 25 (24-27) | | | 31 (28-34) | MOLLI | | N/A | | | Philips | 1.5 T |
| Isaaki 2021 | 962 (945-979) | | 1031 (985-1077) | 51 (49-53) | | | | 58 (53-63) | | 26.5 (23.7-29.3) | | | 29.2 (23.3-35.1) | MOLLI | | GraSE | | | Philips | 1.5 T |
| Palmisano 2020 | 1008 (988-1033) | | 1093 (1050-1201) | 47 (46-47.6) | | | | 55 (52-59) | | 25 (24-26) | | | 30 (27-32) | MOLLI | | N/A | | | Philips | 1.5 T |
| Luetkens 2015 | 966.9 (939.1-994.7) | | 1048.6 (996.7-1100.5) | 52.42 (49.86-54.98) | | | | 60.43 (52.96-67.9) | | 27.68 (21.86-33.5) | | | 34.47 (25.95-43.99) | MOLLI/ShMOLLI | | GraSE | | | Philips | 1.5 T |
| Li 2021 | 1195 (1152-1238) | | 1252 (1210-1294) | 54.5 (50.8-58.2) | | | | 63.2 (57.1-69.3) | | 29.3 (25.2-33.4) | | | 32.7 (29.4-36) | MOLLI | | GraSE | | | Philips | 3 T |
| Lurz 2016 | 1044 (1002-1086) | | 1113 (1046-1180) | 56.9 (49.7-64.1) | | | | 62.2 (57.7-66.7) | | 31.8 (26.9-36.7) | | | 37.2 (30.7-43.7) | MOLLI | | N/A | | | Philips | 1.5 T |
| Knobelsdorff-Brenkenhoff 2017 | | 975 (957-1004) | | 1004 (988-1048) | | | 50.2 (49.2-52) | | | 55.1 (53.3-57.2) | 24 (24-25) | | 26 (25-28) | MOLLI | | bSSFP | | | Philips | 1.5 T |
| Luetkens 2019 | | 965.8 (940.7-990.9) | | | 1047.0 (993.2-1100.8) | 52.8 (50.4-55.2) | | | 61.8 (53.6-70) | | | 26.1 (21.9-30.3) | 28.6 (23.3-33.9) | | MOLLI | | GraSE | Philips | | 1.5 T |
| Dabir 2019 | | 958.9 (936.4-981.4) | | | 1027.2 (977.9-1076.5) | 51.6 (49.7-53.5) | | | 58 (52-64) | | | 27.7 (24.5-30.9) | 32 (25.6-38.4) | | MOLLI | | GraSE | Philips | | 1.5 T |
| Brendel 2022 | | 1015 (1015-1015) | | | 1069 (1024-1127) | 50 (50-50) | | | 53 (52-56) | | | 30 (30-30) | 33 (31-35) | | MOLLI | | bSSFP | Philips | |  |
| Optimal Diagnostic Thresholds* | | Native T1 Threshold=1021 ms  ROC AUC=0.82  Sensitivity=91%  Specificity=73% | | | | T2 mapping threshold=54 ms  ROC AUC=0.93  Sensitivity=82%  Specificity=82% | | | | | | ECV threshold=28%  ROC AUC=0.79  Sensitivity=82%  Specificity=73% | | |  | | | | | |

*Ms: millisecond*

*T1: Native T1*

*Acute myocarditis: patients presenting with symptoms within 28 days.*

**Table 2: CMR characteristics of included studies**

**Optimal diagnostic thresholds were determined using ROCs curve*

**Table 3:** **Quality Assessment (QADAS-2)**

| Study Number | Study ID | Domain 1 | Domain 2 | Domain 3 | Domain 4 | Overall Risk of Bias |
| --- | --- | --- | --- | --- | --- | --- |
| 1 | Huber 2018 | Low | Low | Low | Low | Low |
| 2 | Radunski 2014 | Low | Low | Low | Low | Low |
| 3 | Isaak 2021 | Low | Low | Low | Low | Low |
| 4 | Palmisano 2020 | Low | Low | Low | Unclear | Low |
| 5 | Luetkens 2015 | Low | Low | Low | Unclear | Low |
| 6 | Li 2021 | Low | Low | Low | Low | Low |
| 7 | Lurz 2016 | Low | Low | Low | Low | Low |
| 8 | Knobelsdorff-Brenkenhoff 2017 | Low | Low | Low | Low | Low |
| 9 | Luetkens 2019 | Low | Low | Low | Unclear | Low |
| 10 | Dabir 2019 | Low | Low | Low | Low | Low |
| 11 | Brendel 2022 | Low | Unclear | High | Low | High |

*Domain 1: Was the patient population representative of the population under investigation, with clear criteria for patient inclusion and exclusion, enrollment through consecutive or random sampling, and balanced reporting of patient demographics (age, gender) across study groups? , Domain 2: Were the CMR parameters (T1, T2, ECV) described in sufficient detail, with consistency in the application and interpretation of CMR techniques across studies, blinded assessment of CMR parameters to the reference standard results, and a pre-specified threshold for abnormal CMR findings?, Domain 3: Was endomyocardial biopsy deemed an appropriate reference standard for myocarditis diagnosis, with blinded interpretation of biopsy findings to CMR parameter results, consistency in the application of clinical criteria across studies, and uniform timing of clinical criteria utilization in relation to symptom presentation?, Domain 4: Was there inclusion of all eligible patients in the analysis, with consistent intervals between symptom presentation and CMR testing, CMR testing and the reference standard (EMB/clinical criteria), and analysis of patients in the groups to which they were initially assigned?*

**Table 4: Diagnostic accuracies and heterogeneity indices of individual mapping parameters Native T1, T2 mapping and ECV**

| Parameter | Sensitivity | Inconsistency (I-square) | Specificity | Inconsistency (I-square) | Diagnostic Odds Ratio (DOR) | Area Under Curve (AUC) |
| --- | --- | --- | --- | --- | --- | --- |
| Native T1 | 83% | 69% | 86% | 75% | 39 | 0.91 |
| T2 | 81% | 72% | 86% | 69% | 25 | 0.89 |
| ECV | 71% | 72% | 81% | 37% | 13 | 0.83 |

**Table 5: Results of meta-regression and subgroup analyses based on reference standard of studies.**

| Mapping technique | Approach | Study number | sensitivity | p-value | specificity | p-value |
| --- | --- | --- | --- | --- | --- | --- |
| Native T1 | Clinical | 7 | 79% (70-87) | 0.77 | 92% (87-96) | 0.001 |
| EMB | 4 | 88% (82-93) | 70% (50-84) |
| T2 | Clinical | 7 | 78% (67-87) | 0.205 | 90% (84-93) | 0.076 |
| EMB | 4 | 85% (79-90) | 77% (56-90) |
| ECV | Clinical | 7 | 67% (55-78) | 0.174 | 84% (78-89) | 0.102 |
| EMB | 4 | 81% (64-91) | 74% (62-84) |

**Table 6: Results of diagnostic values of combined parametric mapping techniques**

| S.N. | Author | Combination | Sensitivity | Specificity |
| --- | --- | --- | --- | --- |
| 1. | **Radunski et al** | LGE+ECV | 94% (88-98) | 71% (48-89) |
| 2. | **Isaak et al** | T1+T2 mapping | 85% (64–96) | 100% (79–100) |
| 3. | **Li et al** | 1. T1+T2 mapping 2. LGE + T2 mapping | a. 82.2%  b. 79.5% |  |
| 4. | **Brenkenhoff et al** | a. T1+T2  b. T2+ECV  c. T1+LGE  d. T2+LGE  e. T1+T2+LGE | a.77.8% (52.4-93.6)  b.82.4% (56.6-96.2)  c.72.2% (46.5-90.3)  d.66.7% (41-86.7)  e. 66.7% (41-86.7) | a. 94.4% (72.7-99.9)  b.94.4% (72.7-99.9)  c.100% (81.5-100)  d. 100% (81.5-100)  e. 100% (81.5-100) |
| 5. | **Brendel et al** | 1. T1 + ECV 2. T2 + ECV | a. 96%  b. 83% | a. 83%  b. 92% |

*All the combinations are based on Native T1 mapping.*
